# Supplementary material
Source: PubMed Central journal article supplement (PMC4454081)
Supplement: jcbn14-108s01.pdf [file jcbn14-108s01.pdf]

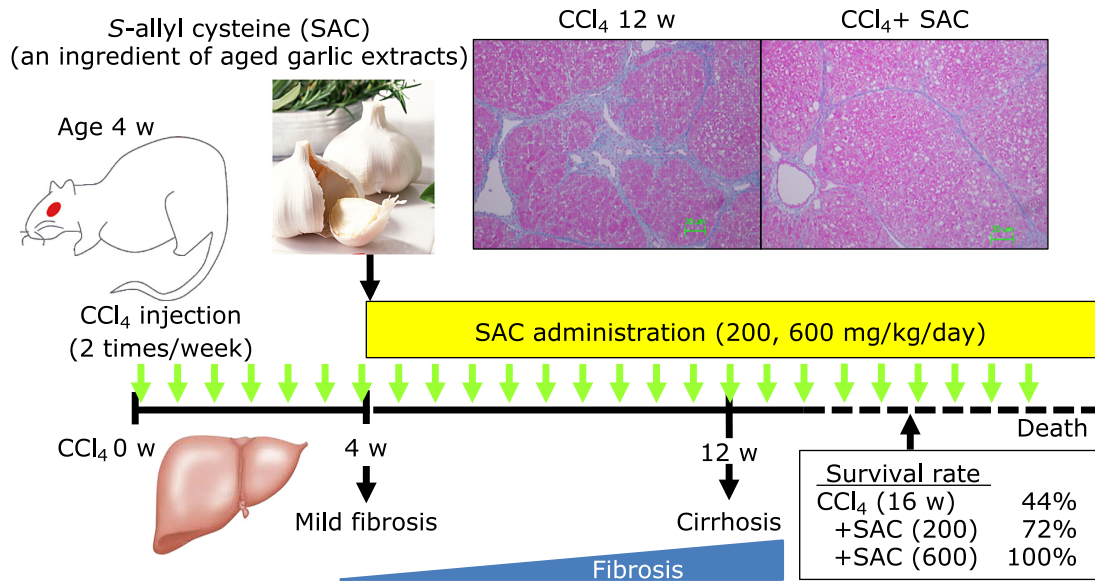

**Supplemental Fig. 1.** This graphic is an abstract figure to capture the reader's attention and, in conjunction with the manuscript's title.
